# Supplementary material for: Microbial carbon use for incorporating biomass phosphorus drives CO 2 emission in phosphorus-supplied subtropical forest soils
Source: Copernicus journal article supplement (doi:10.5194/egusphere-2025-310), 2025-02-04
Supplement: Supplementary file 1 [file egusphere-2025-310-supplement.pdf]

**Microbial carbon use for incorporating biomass phosphorus drives CO<sub>2</sub> emission  
in phosphorus-supplied subtropical forest soils**

Jianghao Tan <sup>1,3#</sup>, Muhammed Mustapha Ibrahim <sup>1#</sup>, Huiying Lin <sup>1,2</sup>, Zhaofeng Chang <sup>1,2</sup>, Conghui Guo <sup>1,2</sup>, Zhimin Li <sup>1</sup>, Xianzhen Luo <sup>1</sup>, Yongbiao Lin <sup>1</sup>, Enqing Hou <sup>1\*</sup>

<sup>1</sup> Guangdong Provincial Key Laboratory of Applied Botany & Key Laboratory of National Forestry and Grassland Administration on Plant Conservation and Utilization in Southern China, South China Botanical Garden, Chinese Academy of Sciences, Guangzhou 510650, China

<sup>2</sup> University of Chinese Academy of Sciences, 100039, Beijing, China

<sup>3</sup> Shanxi Agricultural University, Jinzhong 030801, China

# These authors contributed equally to this work

\* Corresponding author: [hoeq@scbg.ac.cn](mailto:hoeq@scbg.ac.cn) (E. Hou).

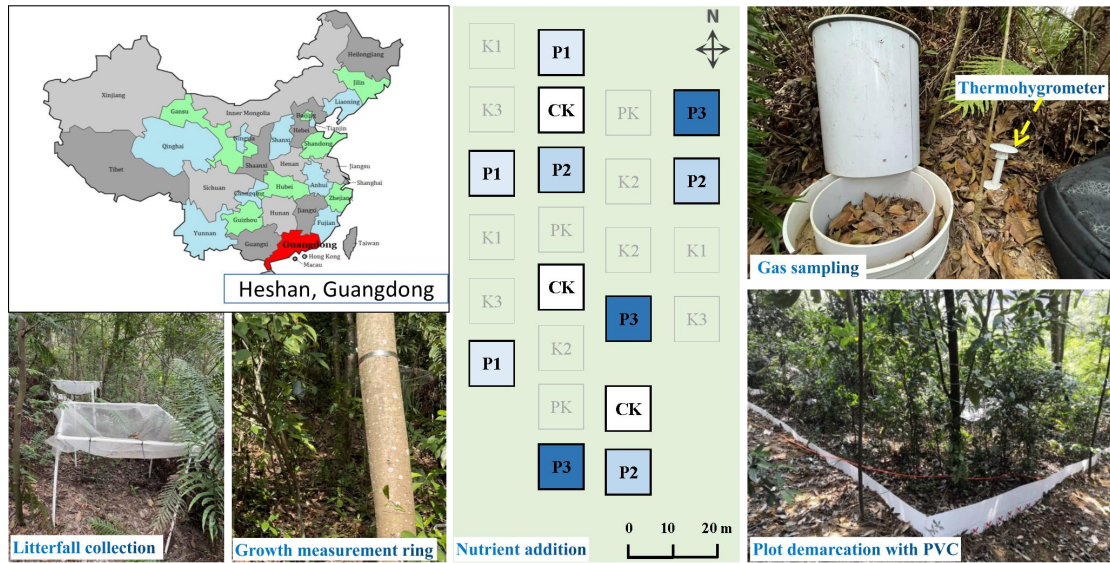

**Fig. S1.** Study site showing phosphorus and potassium addition in an evergreen broad-leaved forest at the station (Note: only four phosphorus addition treatments were used in the current study: +0, +25, +50, and +100 kg P ha<sup>-1</sup> yr<sup>-1</sup>, and three replicates of each treatment were denoted by CK, P1, P2, and P3, respectively)

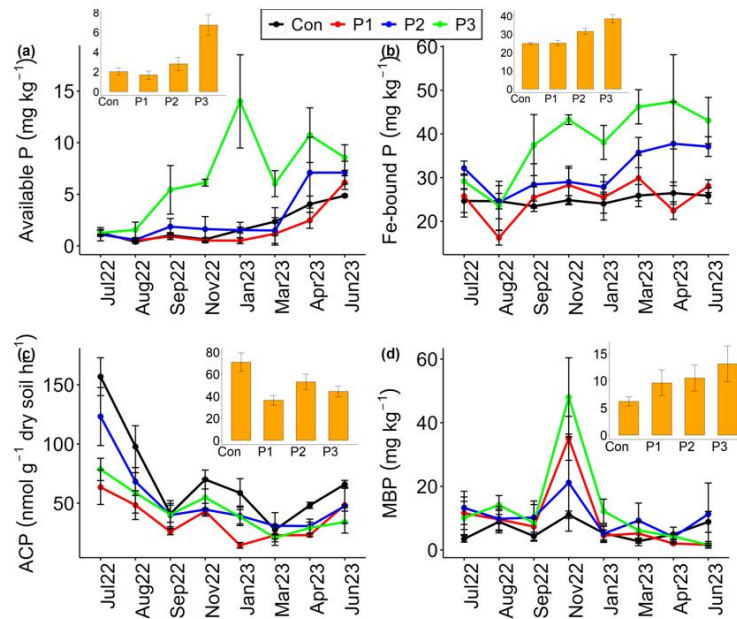

**Fig. S2.** Repeated measures of soil P dynamics over one year after phosphorus (P) additions in the 10-20 cm depth. (a) available P concentration extracted by Bray-1 method, (b) iron-bound P (NaOH Pi) concentration, (c) acid phosphatase activity, and (d) microbial biomass P concentration. Each line/bar represents the mean value of each treatment ( $n=3$  (lines),  $n=24$  (bars),  $p < 0.05$ ). The error bars represent the standard error of the mean. Con: control, P1: 25 kg P ha<sup>-1</sup>, P2: 50 kg P ha<sup>-1</sup>, P3: 100 kg P ha<sup>-1</sup>.

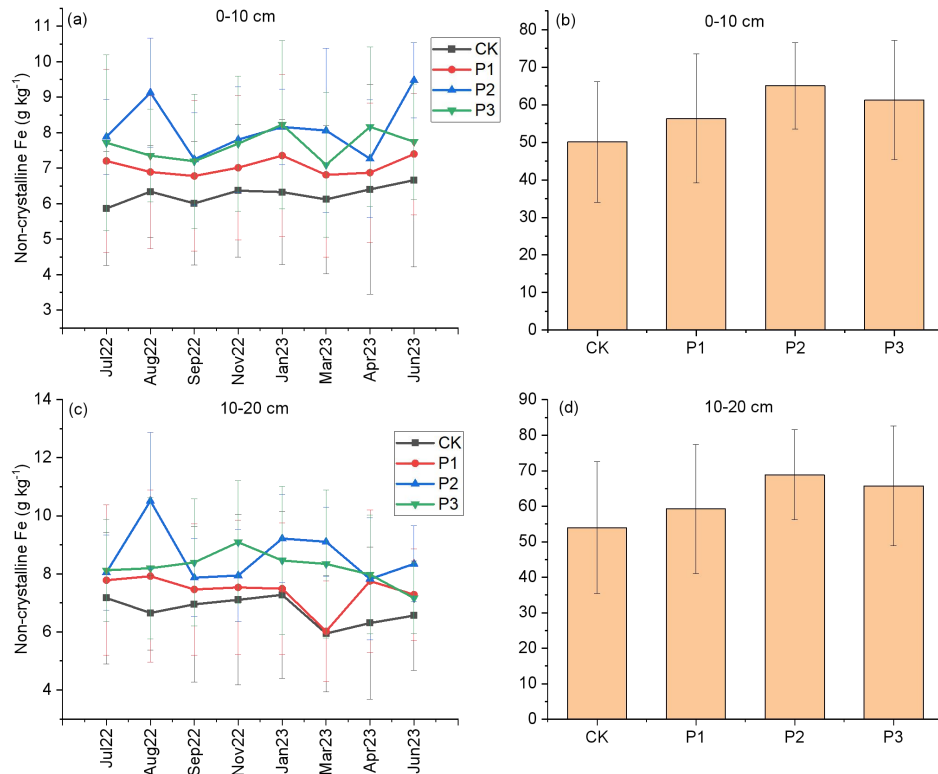

**Fig. S3.** Dynamics of non-crystalline iron (Fe) concentration across sampling times in different soil depths following P addition. a. non-crystalline Fe concentration across sampling time in the 0-10 cm depth, b. cumulative non-crystalline Fe concentration in the 0-10 cm depth, c. non-crystalline Fe concentration across sampling time in the 10-20 cm depth, and d. cumulative non-crystalline Fe concentration in the 10-20 cm depth. Each line/bar represents the mean value of each treatment ( $n=3$  (lines),  $n=24$  (bars),  $p < 0.05$ ). The error bars represent the standard deviation of the mean, using Tukey's test ( $n=24$ ,  $p < 0.05$ ). CK: control, P1: 25 kg P ha<sup>-1</sup>, P2: 50 kg P ha<sup>-1</sup>, P3: 100 kg P ha<sup>-1</sup>.

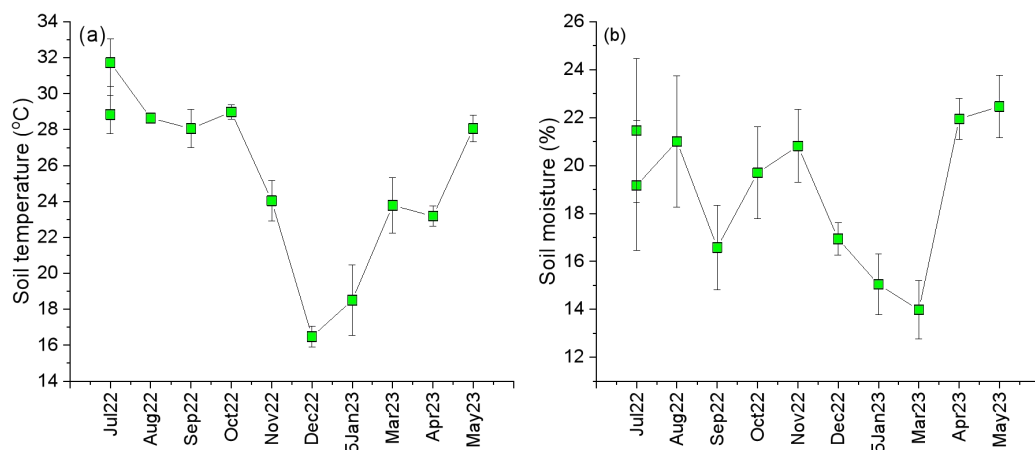

**Fig. S4.** Dynamics of soil physical properties a. soil temperature, and b. soil moisture content. Each line/bar represents the mean value of each treatment ( $n=6$ ,  $p < 0.05$ ). The error bars represent the standard error (SE) of the mean, using Tukey's test

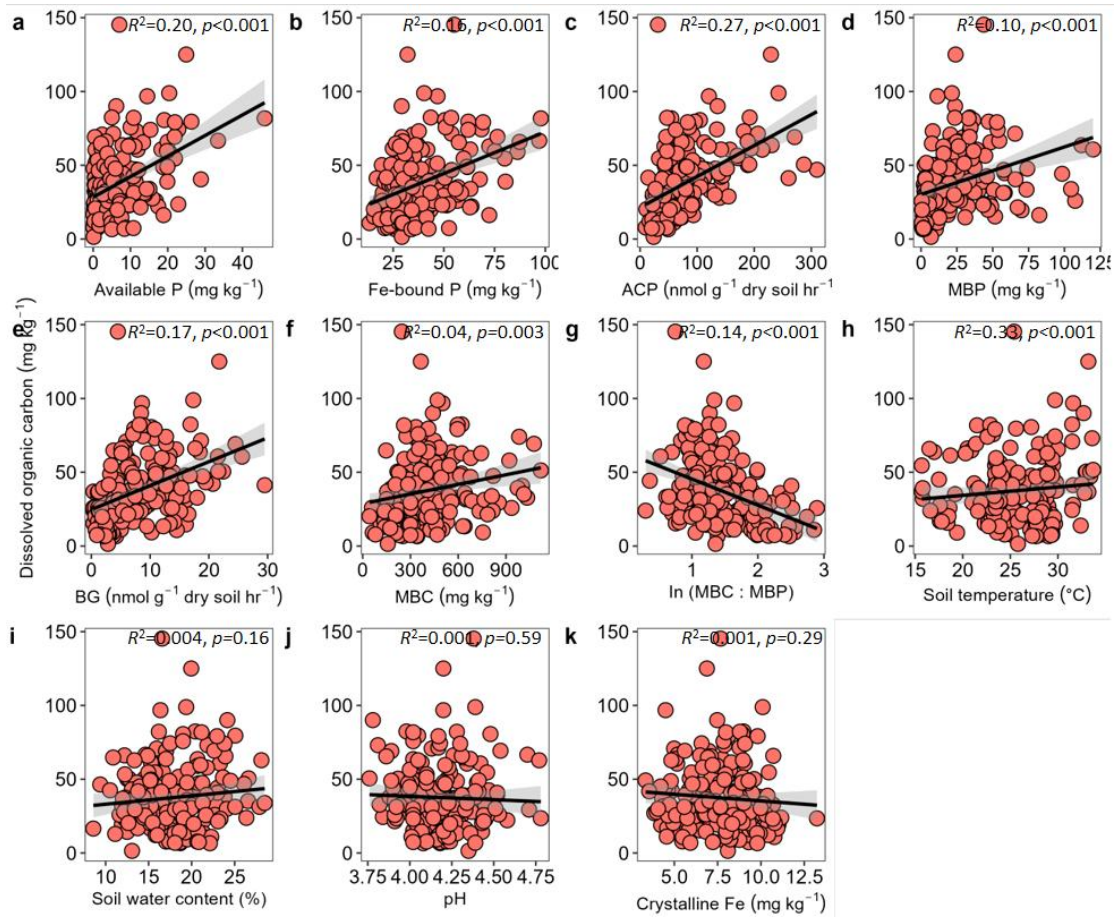

**Fig. S5.** Linear regression modeling showing the relationships between dissolved organic carbon (C) and soil phosphorus (P) and C fractions in the 0-20 cm depth following P supplies. ACP: acid phosphatase, BG: beta-glucosidase, MBC: microbial biomass C, MBP: microbial biomass P, Fe: iron

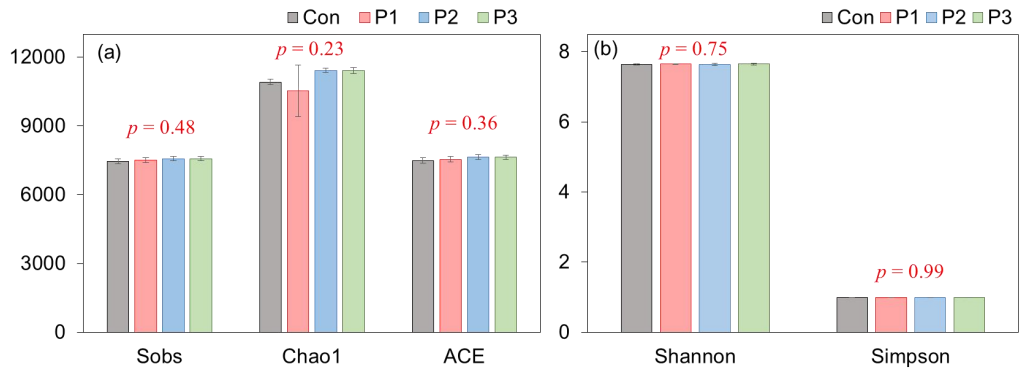

**Fig. S6.** Alpha diversity indices of total microbial gene knockout identities following phosphorus addition. a. Observed Species (Sobs), Chao1, and Abundance-based Coverage Estimator (ACE) and b. Shannon and Simpson indices. Con: control, P1: 25 kg P ha<sup>-1</sup>, P2: 50 kg P ha<sup>-1</sup>, P3: 100 kg P ha<sup>-1</sup>.

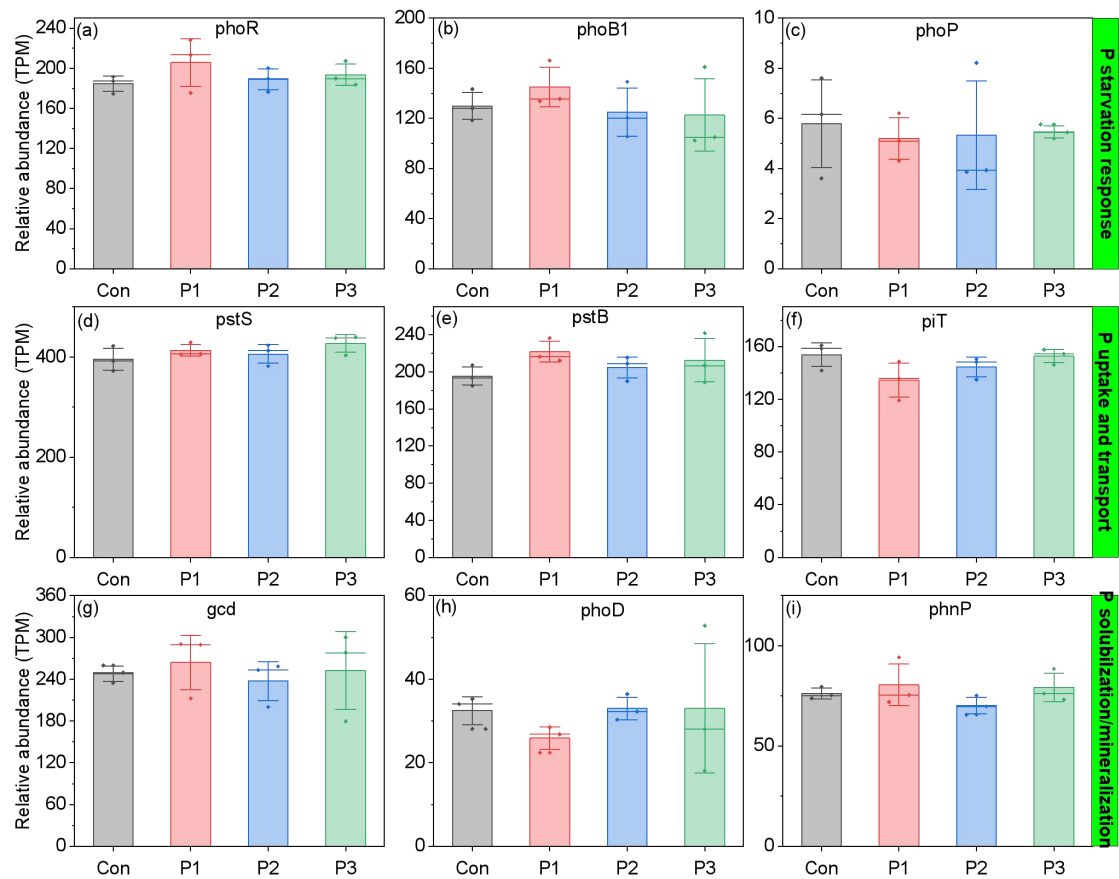

**Fig. S7.** Shifts in the relative abundance of phosphorus cycling functional gene knockouts following P addition. TPM: transcripts per million, CK: control, P1: 25 kg P ha<sup>-1</sup>, P2: 50 kg P ha<sup>-1</sup>, P3: 100 kg P ha<sup>-1</sup>.
